# Supplementary material for: Graphene hydrogels non-covalently functionalized with alizarin: an ideal electrode material for symmetric supercapacitors
Source: Royal Society of Chemistry journal article supplement (doi:10.1039/c5ta05812k), 2015-01-01
Supplement: c5ta05812k1.pdf [file c5ta05812k1.pdf]

## Electronic Supplementary Information

### **Graphene hydrogels functionalized non-covalently by Alizarin: an ideal electrode materials for symmetric supercapacitor**

*Ning An, Yufeng An, Zhongai Hu\*, Bingshu Guo, Yuying Yang, Ziqiang Lei*

Key Laboratory of Eco-Environment-Related Polymer Materials of Ministry of Education, Key Laboratory of Polymer Materials of Gansu Province, College of Chemistry and Chemical Engineering, Northwest Normal University, Lanzhou, Gansu 730070, China.

#### **Calculations of specific capacitance, energy density and power density based on the galvanostatic charge-discharge curves:**

(1) In three electrode configuration, specific capacitances derived from galvanostatic tests can be calculated from the equation:

$$C = I\Delta t / m\Delta V \quad (1)$$

where I is the discharging current, t is the discharge time,  $\Delta V$  is the potential drop during discharge, and m is the mass of active material in the working electrode.

(2) In two electrode symmetric cell configuration, specific capacitances of capacitor derived from galvanostatic tests can be calculated from the equation:

$$C = 4(I\Delta t / m\Delta V) \quad (2)$$

where I is the constant discharge current,  $\Delta t$  is the discharging time, m is the total mass of two electrodes, and  $\Delta V$  is the voltage drop upon discharging.

Energy density (E) and power density (P) derived from galvanostatic tests can be calculated from the following equations:

$$E = [C (\Delta V)^2] / 8 \quad (3)$$

$$P = E / \Delta t \quad (4)$$

where E, C,  $\Delta V$ , P and  $\Delta t$  are the specific energy, specific capacitance, potential window, specific power and discharge time, respectively.

---

\*Corresponding author. Tel.: +86 931 7973255; Fax: +86 931 8859764.  
E-mail address: [zhongai@nwnu.edu.cn](mailto:zhongai@nwnu.edu.cn) (Zhong-ai Hu)

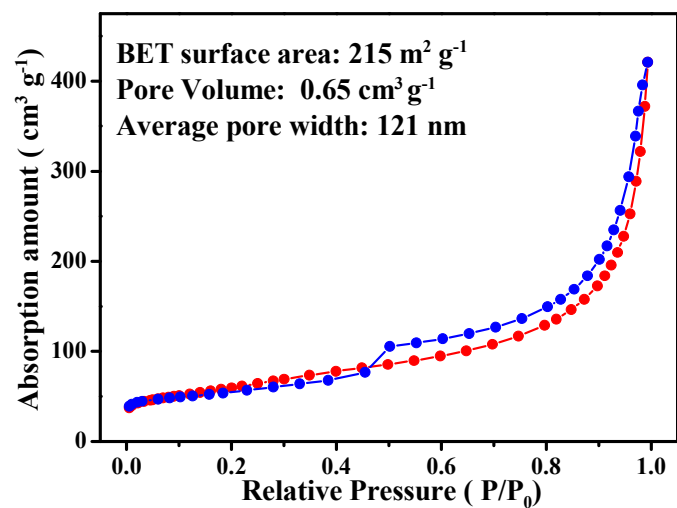

**Fig. S1.** Typical nitrogen sorption isotherms of SGHs.

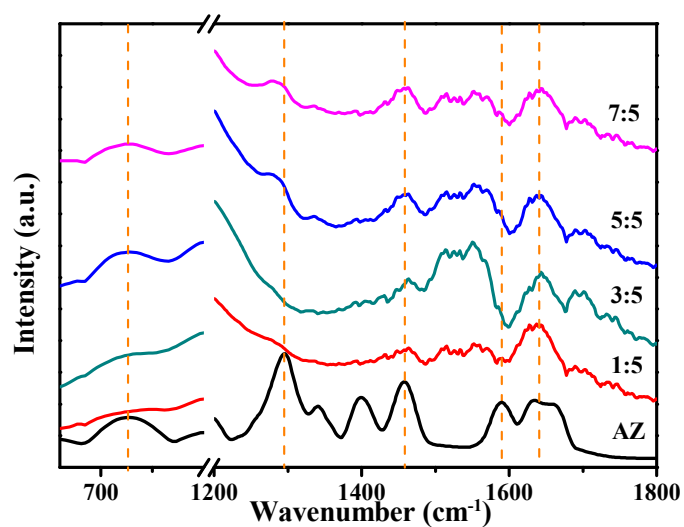

**Fig. S2.** FT-IR spectra of AZ and AZ@SGHs composite with different mass ratios of AZ (x) to SGHs (y).

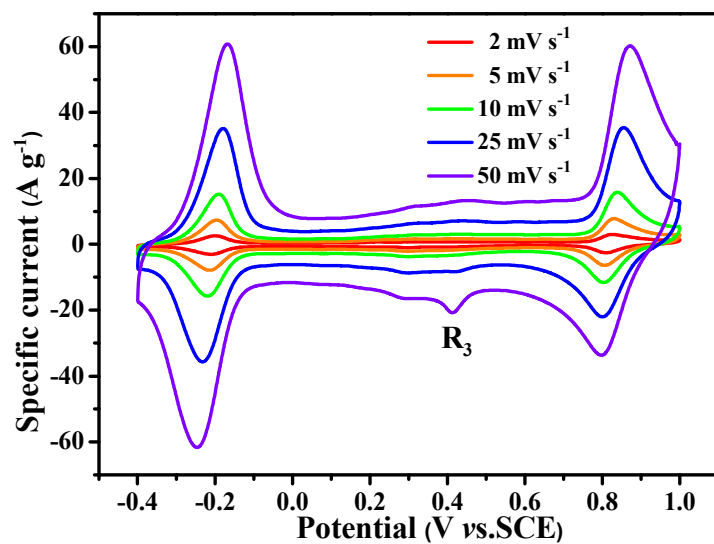

**Fig. S3.** CV curves of AZ@SGHs 3:5 at different scan rates in 1 mol L<sup>-1</sup> H<sub>2</sub>SO<sub>4</sub> aqueous solution.

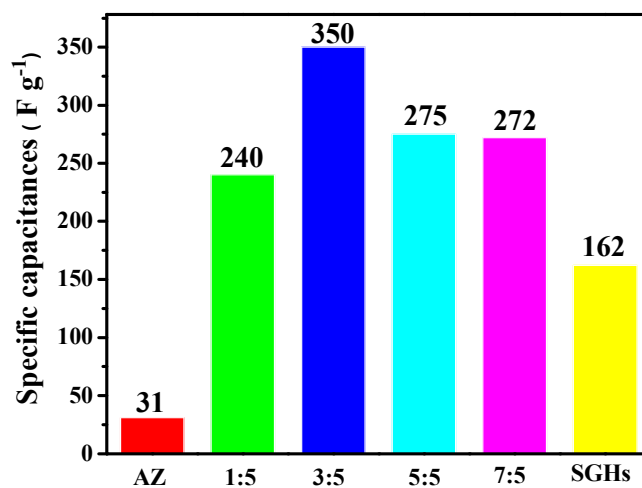

**Fig. S4.** The specific capacitance of pure AZ, SGHs and AZ@SGHs composites with different mass ratios of AZ (x) to SGHs (y).

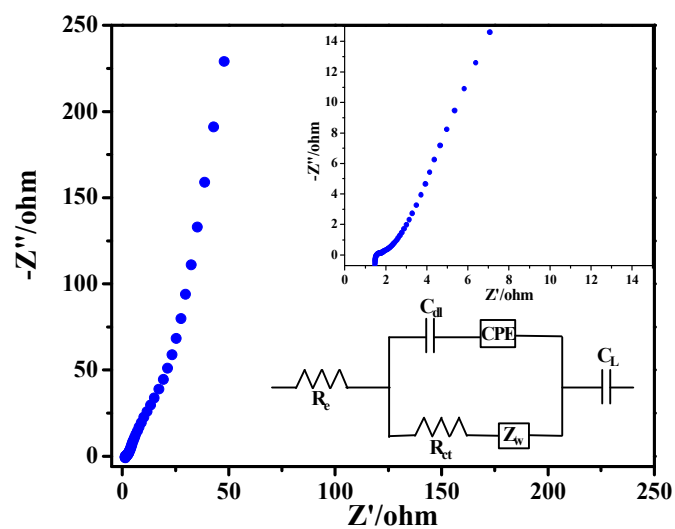

**Figure S5.** Nyquist plots of AZ@SGHs symmetric supercapacitors for two-electrode system (the inset of modeled equivalent circuit of electrochemical impedance spectroscopy).
